# Supplementary material for: CsPbBr3 interconnected microwire structure: temperature-related photoluminescence properties and its lasing action
Source: Royal Society of Chemistry journal article supplement (doi:10.1039/c9tc02913c), 2019-01-01
Supplement: c9tc02913c1.pdf [file c9tc02913c1.pdf]

## Supporting Information

# CsPbBr<sub>3</sub> Interconnected Microwire Structure: Temperature-related Photoluminescence Properties and Its Lasing Action

Canran Zhang,<sup>a,†</sup> Junjie Duan,<sup>a,†</sup> Feifei Qin,<sup>b</sup> Chunxiang Xu,<sup>b</sup> Wei Wang,<sup>c</sup> Jun Dai<sup>a,\*</sup>

*a. Department of Physics, Jiangsu University of Science and Technology,*

*Zhenjiang, 212003, China. E-mail: [daijun@just.edu.cn](mailto:daijun@just.edu.cn)*

*b. State Key Laboratory of Bioelectronics, Southeast University,*

*Nanjing 210096, China.*

*c. School of Engineering and Physical Science, Heriot-Watt University,*

*Edinburgh, EH14 4AS, United Kingdom*

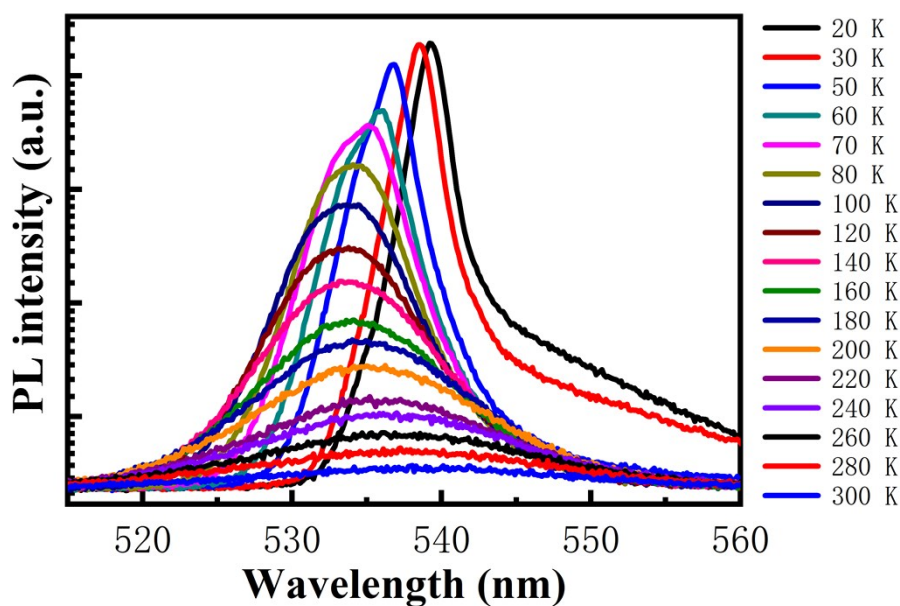

Figure S1. The separated temperature-dependent PL spectrum corresponding to Figure 2(a-b).

† These authors contribute equally to this work.

\* Corresponding author.
